# Supplementary material
Source: publisher figshare collection journal article supplement (https://acs.figshare.com/ndownloader/files/3920863)
Supplement: Supplementary file 1 [file 3920863]

# Thin Film Receiver Materials for Deterministic Assembly by Transfer Printing

Tae-il Kim<sup>\*,†</sup>, Mo Joon Kim<sup>#</sup>, Yei Hwan Jung<sup>§</sup>, Hyejin Jang<sup>†</sup>, Canan Dagdeviren<sup>‡</sup>, Hsuan An Pao<sup>‡</sup>, Sang June Cho<sup>§</sup>, Andrew Carlson<sup>‡</sup>, Ki Jun Yu<sup>||</sup>, Abid Ameen<sup>‡</sup>, Hyun-joong Chung<sup>※</sup>, Sung Hun Jin<sup>‡</sup>, Zhenqiang Ma<sup>§</sup>, and John A. Rogers<sup>\*,‡,||,§</sup>

<sup>†</sup>Center for Neuroscience Imaging Research (CNIR), Institute of Basic Science (IBS); School of Chemical Engineering, Sungkyunkwan University (SKKU), Suwon 440-746, Korea

<sup>#</sup>R&I Korea, Solvay Special Chemicals, Solvay Korea Co. LTD, Seoul 120-750, Korea

<sup>§</sup>Department of Electrical and Computer Engineering, University of Wisconsin-Madison, Wisconsin 53706, USA;

<sup>‡</sup>Department of Materials Science and Engineering, University of Illinois at Urbana-Champaign, Urbana, IL 61801, USA;

<sup>||</sup> Department of Electrical Computer and Engineering, University of Illinois at Urbana-Champaign, Urbana, IL 61801, USA;

<sup>※</sup> Department of Chemical and Materials Engineering, University of Alberta, Edmonton, AB T6G 2V4, Canada

<sup>||</sup> Department of Electrical and Computer Engineering, University of Illinois at Urbana-Champaign, Urbana, IL 61801, USA

<sup>§</sup> Chemistry; Mechanical Science and Engineering; Beckman Institute for Advanced Science and Technology; Frederick Seitz Materials Research Laboratory, University of Illinois at Urbana-Champaign, Urbana, IL 61801, USA

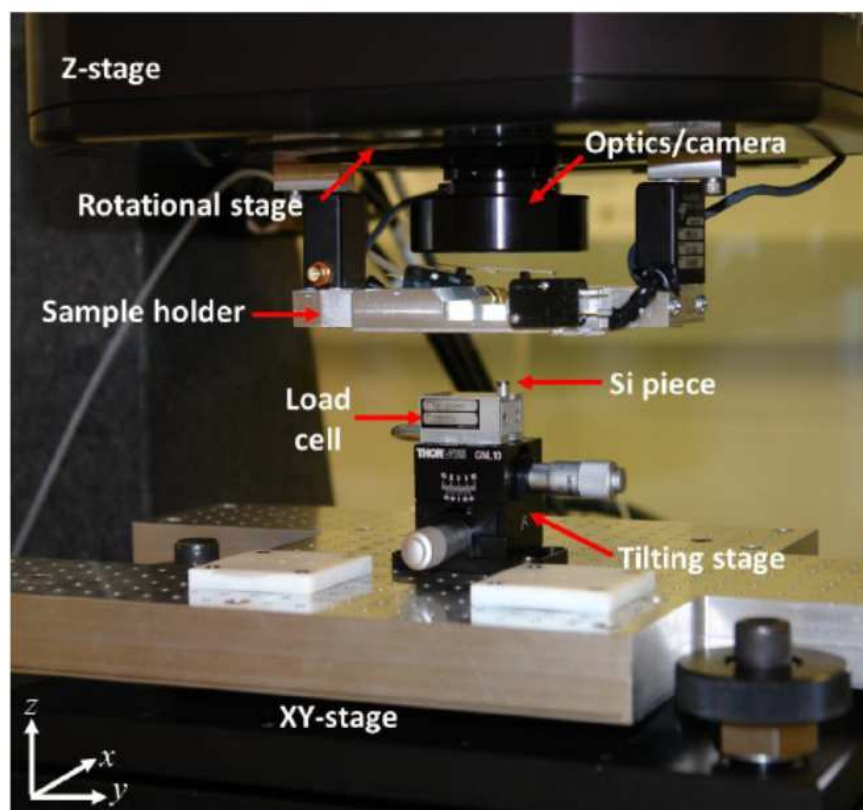

**Figure SI1.** Image for stage of adhesion force measurement.

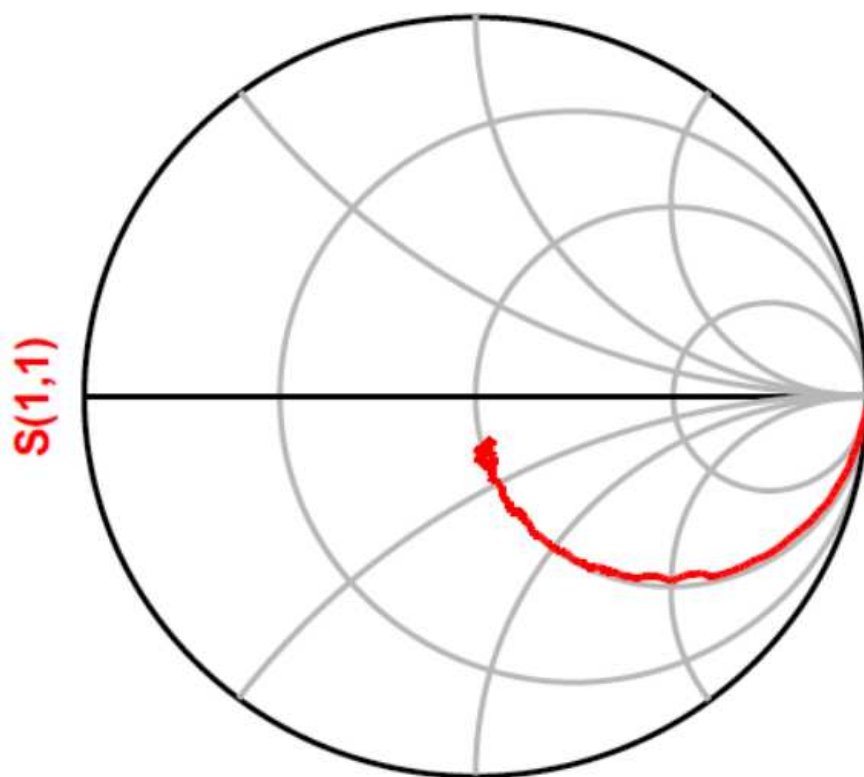

**Figure SI2.** Measured  $S_{11}$  result of the MIM capacitor on a Smith chart from 100 MHz to 20 GHz
